# Supplementary material for: Genetic variation between long-lived versus short-lived bats illuminates the molecular signatures of longevity
Source: Aging (Albany NY). 2020 Aug 31;12(16):15962–77. doi: 10.18632/aging.103725 (PMC7485743; doi:10.18632/aging.103725)
Supplement: Supplementary Table 2 [file aging-12-103725-s001..xlsx]

## Sheet: Sheet1
GO terms	Description	No. of genes	Log (FDR)	Gene symbols
GO:0044772	mitotic cell cycle phase transition	102	-7.3148	BACH1,BID,CASP2,CCNA2,CCND3,CCNG1,CCNH,CDC25A,CDK7,CDKN2C,CETN2,CKS2,PLK3,GADD45A,E2F6,EIF4E,EPS8,GFI1,HSPA2,MAX,MCM4,MCM5,MCM6,MNAT1,NASP,NBN,NPAT,ODF2,ORC1,POLE,PPP6C,PRIM1,PSMA3,PSMB2,PSMB5,PSMC5,PTEN,RBL1,RBL2,RPA3,RPS6KB1,SKP1,TERT,TPD52L1,XPC,CDC7,CDC45,GFI1B,CUL4B,CDK10,RIPK1,CDC16,TRIP13,CNOT8,PSMF1,VPS4B,ESPL1,CCP110,MELK,RBX1,PSME3,TUBB4B,MAD2L2,CARM1,KHDRBS1,PLK4,NEK6,CCNI,CNTRL,UBE2C,…
GO:0006403	RNA localization	54	-7.3148	CETN2,DHX9,DKC1,EIF4E,FMR1,AGFG1,MAGOH,NCBP1,NUP88,RANBP2,SFPQ,SRSF3,SRSF7,TERF2,U2AF1,YY1,AAAS,RAE1,THOC5,RUVBL1,TNKS,QKI,NUP155,DHX38,SMG7,G3BP2,SRRM1,KHDRBS1,CCT8,CPSF6,NUP42,DDX19B,EXOSC2,NUP188,SETD2,DDX25,NUP54,CPSF2,ZNHIT6,DDX19A,NCBP3,IWS1,NDC1,NXT2,XPO5,SENP2,RANBP17,UPF3B,THOC7,SEH1L,SARNP,NAF1,NUP35,DCP2,SLC25A4,RIPK1,SLC28A1,SLC35B1,SLC35D2,SLC35A3,SLC25A32,IFI27,ATXN1,NEMF,ANP32B,CTD…
GO:0090407	organophosphate biosynthetic process	112	-6.79755	ACHE,ADCY5,ADK,ADSL,ARF3,ATP5PF,CYC1,DLAT,DLD,DUT,ERH,FABP5,GART,GUCA2B,HEXB,HTR2C,IDO1,MOCS1,MTM1,NTSR1,NUP88,PCYT1A,PDHA1,PFKFB3,PFKFB4,PGK1,PIGF,PIK3C3,PI4KA,PKLR,PLA2G5,PLD1,PPARA,PRPSAP1,PTEN,RAB4A,RAB5A,RANBP2,RRM1,SCD,TAZ,UMPS,PDHX,AAAS,RAE1,SLC25A12,DPM1,INPP4B,SYNJ1,MTMR2,NFS1,MTMR4,SPTLC2,TBPL1,NUP155,PPIP5K1,XYLB,GPHN,ATP5PD,NUP42,PLAAT3,ECD,SACM1L,ACSBG1,PLCB1,NUP188,RAB38,HDHD5,HSD17…
GO:0044257	cellular protein catabolic process	119	-6.53714	ARAF,CTSC,ERCC8,CLU,CLTA,PLK3,CTNNB1,CTSH,CLN8,FMR1,UBE2K,HSP90AB1,IFI27,MTM1,PSMA3,PSMB2,PSMB5,PSMC5,PTEN,RAD23B,RNF4,RNF5,RNF6,RPL5,SCO1,SKP1,TAF1,TMF1,TSG101,UBA52,UBE2I,UBE2N,UCHL3,USP4,VLDLR,UBXN8,CUL4B,RIPK1,CDC16,USP14,USP8,NEMF,RPL23,UBE4A,PLAA,PSMF1,VPS4B,CLOCK,EDEM1,RNF40,USP3,RBX1,HDAC6,PSME3,TRIM13,WWP2,UBE2C,ATE1,GLMN,RNF13,FAF2,PSME4,UBR2,USP24,CD2AP,TRIM58,FBXL3,KLHL3,RNF115,USP25,…
GO:0006397	mRNA processing	91	-6.49021	CCNH,CDK11B,CDC5L,CDK7,CLNS1A,DHX9,ERN1,FMR1,HNRNPD,HNRNPH1,HNRNPH3,MAGOH,MNAT1,HNRNPM,NCBP1,POLR2K,SAFB,SFPQ,SRSF3,SRSF7,SNRPD1,SNRPD3,SNRPE,SRPK1,TIA1,U2AF1,USP4,DHX16,THOC5,PRPF4B,ZRANB2,DDX23,QKI,CTR9,DHX38,RNF40,RBM19,SRRM1,KHDRBS1,TENT4A,CPSF6,ECD,KHDC4,RALY,PDCD11,PPWD1,SF3B3,VIRMA,DAZAP1,SRPK3,RBMX,HTATSF1,TRA2A,CDK12,C9orf78,CPSF2,PRMT7,AURKAIP1,PRPF38B,MTPAP,RBM41,NCBP3,RNPC3,IWS1,LUC7L…
GO:0051301	cell division	96	-5.98575	ANK3,ANXA11,RHOC,CCNA2,CCND3,CCNG1,CDC25A,CDK7,CETN2,CKS1B,CKS2,CLTA,PLK3,DCT,E4F1,FGF7,FGFR2,GNAI1,KIT,MAP4,SEPTIN2,NEK3,PIK3C3,RASA1,RBL1,RBL2,ROCK1,TSG101,UBE2I,UVRAG,VRK1,CDC7,RAE1,RUVBL1,TNKS,CCNK,CDC16,PRC1,USP8,VPS4B,KIF20B,ESPL1,CCP110,IST1,DCLRE1A,ACTR3,MAD2L2,STAMBP,STAG2,NEK6,KIF2C,CNTRL,UBE2C,OIP5,SPART,CLASP2,CLASP1,SPECC1L,NCAPH,CD2AP,KIF4A,NSL1,CHMP2B,LATS2,INTU,CHMP2A,SETD2,GPSM2,…
GO:0006281	DNA repair	90	-5.81908	ATRX,BACH1,CCNH,CDC5L,CDK7,CETN2,ERCC8,GADD45A,DHX9,DDX11,FANCE,FANCB,MCM4,MCM5,MCM6,MNAT1,NUDT1,NBN,TONSL,OGG1,PMS2,POLE,POLR2K,RAD23B,RFC3,RPA3,SFPQ,TERF2,UBA52,UBE2N,UBE2V1,UBE2V2,UVRAG,WRN,XPC,YY1,CDC7,CDC45,RAD54L,CUL4B,RUVBL1,MBD4,COPS2,TRIP13,DCLRE1A,USP3,RBX1,MAD2L2,RNASEH2A,RAD51AP1,POLD3,MORF4L1,TENT4A,DMC1,POLG2,FAN1,PSME4,SPO11,SETD2,SHLD2,TMEM161A,WDR70,UBE2W,AP5S1,NPLOC4,TDP1,NSMCE3…
GO:0051186	cofactor metabolic process	94	-5.28593	TSPO,DLAT,DLD,FXN,GART,GCLM,GLO1,GOT1,GPD2,GSTA4,HAGH,HBM,HMGCR,IDO1,MGST2,MOCS1,MTR,MMUT,NUP88,PDHA1,PFKFB3,PFKFB4,PGK1,PHYH,PKLR,PPARA,RANBP2,RPE,SCD,SPR,TAT,TCN1,UROS,PDHX,AAAS,RAE1,SLC25A12,DGAT1,SUCLG2,NFS1,CIAO1,NUP155,HDAC6,COQ7,GPHN,PRDX3,NUP42,ECD,ACSBG1,ETHE1,NUP188,NNT,PDSS1,ACOT11,EIF2AK1,GNMT,COQ2,MAT2B,HSD17B12,CD320,NUP54,CROT,PDPR,PNPO,DHTKD1,NDC1,FAR2,LMBRD1,KYAT3,PDSS2,ENOPH1,MC…
GO:0034655	nucleobase-containing compound catabolic process	99	-5.13929	APAF1,ENTPD2,DDX6,DHX9,DKC1,DPYD,DUT,ERN1,FMR1,GALT,HNRNPD,ISG20,MAGOH,NUDT1,HNRNPM,NCBP1,NUP88,OGG1,PDE7A,PFKFB3,PFKFB4,PGK1,PKLR,PPARA,PPP2CA,PSMA3,PSMB2,PSMB5,PSMC5,RANBP2,ROCK1,RPL5,RPL23A,RPL32,RPL35A,RPL41,RPS10,RPS23,RPS24,RPS26,SET,UBA52,YWHAB,AAAS,RAE1,SLC25A12,PDE8B,PABPC4,MBD4,CNOT8,RPL23,PSMF1,NUP155,SMG7,PSME3,RNASEH2A,PAIP1,TENT4A,NUP42,NUDT4,NUDT3,RPL35,ECD,ENPP4,CNOT1,PSME4,EXOSC2…
GO:0034660	ncRNA metabolic process	88	-4.96367	AARS1,CDK7,DDX11,DKC1,GTF2B,HSD17B10,ISG20,SMAD2,NCBP1,NVL,POLR2K,POU2F1,PPA1,RARS1,RPL5,RPL35A,RPS24,SARS1,SNAPC2,TARS1,VARS,ZNF143,LAGE3,CCNK,USP14,RPP30,WDR4,SPIN1,TDRKH,TENT4A,RPP14,RPL35,SEPHS1,PDCD11,MDN1,EXOSC2,INTS7,PTCD1,RSL1D1,ELP4,PPA2,DIMT1,NOB1,RRNAD1,ESF1,TRMT6,POLR3K,PELO,WDR74,ZNHIT6,DUS2,HEATR1,INTS10,NAT10,MACROH2A2,RARS2,REXO4,INTS2,XPO5,IPPK,MRPS11,MRPL1,NABP2,CARS2,QTRT2,RPP2…
GO:0051640	organelle localization	104	-4.89902	ARCN1,BBS2,CACNB2,CD59,CETN2,CTSC,CTNNB1,F8,FER,FMR1,KCNB1,KIF5A,KIF5B,KIT,MAP4,MEF2A,MTM1,MYO1A,NUP88,ODF2,PDPK1,PLXNA2,PPP6C,PSEN2,PTEN,RAB5A,RAB6A,RANBP2,RAP1A,S100A13,TRAPPC2,UVRAG,STX7,VAMP8,STX16,GBF1,SYNJ1,VAMP3,SNAP29,VPS4B,GOSR1,PREPL,RIMS2,ESPL1,CCP110,SV2A,HDAC6,ACTR3,AP3S2,RABEPK,BET1,TUBB4B,PIBF1,EXOC5,PLK4,TMED10,KIF2C,CNTRL,VPS45,CEP162,CLASP2,EXOC6B,ANKRD28,CLASP1,NCS1,SPO11,TRIM5…
GO:0043043	peptide biosynthetic process	107	-4.72397	AARS1,AKT2,ASMT,DHX9,DHPS,EEF2,EIF2D,EIF4B,EIF4E,EIF4EBP2,FMR1,GCLM,HAGH,HNRNPD,MAGOH,MGST2,MTIF2,NCBP1,PPA1,RARS1,ROCK1,RPL5,RPL23A,MRPL23,RPL32,RPL35A,RPL41,RPS6KA1,RPS6KA3,RPS6KB1,RPS10,RPS23,RPS24,RPS26,SARS1,TARS1,TIA1,UBA52,VARS,CNBP,MKNK1,EIF4EBP3,EIF3F,EIF3J,PABPC4,EIF2B2,NEMF,CNOT8,RPL23,QKI,MTRF1,SECISBP2L,EIF1B,EIF3M,PAIP1,KHDRBS1,RPL35,CNOT1,METAP1,LSM14A,PPA2,EIF2AK1,MRPL42,N6AMT1,DD…
GO:0006892	post-Golgi vesicle-mediated transport	28	-4.71463	AP1G1,ANK3,ARF3,ARF4,BBS2,RP2,VPS52,VAMP8,GBF1,RABEP1,VAMP3,PREPL,DOP1B,SCAMP2,ARFRP1,ARFGEF2,EXOC5,VAMP5,MON2,EXOC6B,RAB26,EHD3,VPS54,CCDC93,WIPI1,GOLPH3L,C16orf70,SYS1,VPS26C,GRASP
GO:0032392	DNA geometric change	30	-4.71147	ATRX,CETN2,ERCC8,DHX9,DDX11,MCM4,MCM5,MCM6,MNAT1,NBN,RAD23B,RFC3,UBA52,WRN,XPC,MTERF1,CDC45,RAD54L,CUL4B,RUVBL1,GINS1,RBX1,POT1,RAD18,CHD9,MCM8,FBH1,ACTR8,HFM1,GTF2H5,CCNH,CDK7,CREB1,DR1,GTF2B,NASP,PSMC5,RNF4,RPA3,SET,TAF1,TCF4,HIRA,ARID1A,RPL23,TBPL1,ANP32B,TAF6L,CTCF,SRCAP,DMC1,OIP5,PSME4,KAT6B,SETD2,UBN1,HP1BP3,TRAPPC12,MIS18A,PBRM1,MACROH2A2,CENPH,CENPM,CENPO,CENPV,SRPK1,NAA10,TENT4A,NCAPH,PA…
GO:0120031	plasma membrane bounded cell projection assembly	90	-4.71147	ATP7A,BBS2,CETN2,LPAR1,EPS8,FER,FMR1,KIT,TACSTD2,MAP4,MYO1A,SEPTIN2,ODF2,P2RX4,PLD1,RAB5A,RAP1A,ROCK1,TRPM2,IFT88,CDK10,CDKL1,SNAP29,ARHGEF6,ATG5,BAG4,RAPGEF2,CCP110,HDAC6,ACTR3,TUBB4B,PIBF1,EXOC5,PLK4,NCKAP1,CNTRL,CEP162,DZIP1,CLASP1,CD2AP,RABGAP1,TTLL1,ATXN10,SH2B1,TBC1D10B,IFT172,PLEK2,INTU,BBS9,DBNL,SNX10,EHD3,ASAP1,NME8,ATP6V1D,TMEM138,HSPB11,RAPGEF6,RAB8B,STK26,TBC1D13,DNAAF5,HAUS4,CEP192,C…
GO:0007005	mitochondrion organization	81	-4.22408	SLC25A4,ATP5PF,ATP7A,BID,TSPO,CLU,CLN8,FXN,GABPA,GABPB1,GCLM,HSD17B10,LETM1,MEF2A,MTM1,NDUFA1,NDUFB8,NDUFS1,NDUFS3,NDUFS5,PPP3CC,SCO1,TAZ,TERT,TFAM,UQCRC2,VDAC1,YWHAB,MTERF1,ATG5,NPEPPS,BAG4,MTFR1,ATG13,AKT3,HDAC6,BCL2L11,TIMM44,ATP5PD,ATG7,PRDX3,AFG3L2,CDC37,POLG2,PMPCA,RAB38,TIMM9,UQCR10,PAM16,ECSIT,NDUFB11,MARCHF5,LEPROT,WIPI1,NDUFAF7,PARL,MFF,CCAR2,UBL5,ATG3,FUNDC2,APOO,DDHD1,RCC1L,SHARPIN,SL…
GO:1901137	carbohydrate derivative biosynthetic process	108	-4.13668	ADCY5,ADK,ADSL,ATP5PF,ATP7A,BMPR2,CTNNB1,CYC1,DAD1,DLAT,DLD,DUT,EXT2,EXTL2,EXTL3,GALNT3,GART,GCNT1,GPC3,STT3A,MAN1A1,MGAT5,NUP88,PDGFRB,PDHA1,PFKFB3,PFKFB4,PGK1,PIGF,PKLR,PLOD2,PPARA,PRPSAP1,RANBP2,RRM1,SCD,ST6GAL1,ST3GAL4,ST8SIA1,TAZ,UMPS,TUSC3,PDHX,AAAS,RAE1,SLC25A12,GALNT4,B4GALT2,DPM1,TBPL1,NUP155,XYLB,GNPDA1,GNE,ATP5PD,SLC35D2,NUP42,GALNT6,MGAT4B,ECD,MGAT4A,CHSY1,ACSBG1,PLCB1,NUP188,BACE2,ST…
GO:0007059	chromosome segregation	55	-3.78665	ATRX,CTNNB1,DDX11,MKI67,SFPQ,SRPK1,HIRA,UBE2I,UVRAG,NAA10,TNKS,PRC1,TRIP13,CIAO1,VPS4B,ESPL1,TLK1,ACTR3,MAD2L2,PIBF1,CTCF,STAG3,STAG2,NEK6,KIF2C,TENT4A,DMC1,OIP5,NCAPH,SPO11,KIF4A,NSL1,CHMP2B,CHMP2A,NTMT1,TRAPPC12,LCMT1,ANAPC11,MIS18A,CDCA8,CEP55,NDC1,RCC2,RAD18,CEP85,MCMBP,DSN1,SEH1L,CIAO2A,KLHL22,KNSTRN,HORMAD2,SGO1,HFM1,AGO4,CKS2,EDN3,EPS8,HSPA2,PDGFRB,AAAS,RAD54L,KIF20B,TDRKH,UBE2C,CLASP2,PLC…
GO:0031123	RNA 3'-end processing	32	-3.61142	DKC1,HSD17B10,MAGOH,NCBP1,SRSF3,SRSF7,U2AF1,THOC5,CTR9,DHX38,RNF40,SRRM1,TENT4A,CPSF6,EXOSC2,INTS7,VIRMA,PTCD1,POLR3K,CPSF2,MTPAP,INTS2,CPEB1,UPF3B,CDC73,CPSF7,ZC3H14,THOC7,INTS14,SARNP,INTS6L,LIN28B,TENT2,ERN1,AGO3,AGO4
GO:0006914	autophagy	69	-2.16633	ADRB2,ATP6V0B,TSPO,CLU,PLK3,EIF4E,ERN1,ITPR1,LGALS8,MTM1,PIK3C3,PRKAB1,PRKAB2,QSOX1,RAB5A,RNF5,ROCK1,MAP3K7,TMBIM6,TSG101,UVRAG,VDAC1,IFT88,LAMTOR3,VAMP8,SNAP29,PLAA,ATG5,SPTLC2,VPS4B,ATP6V1G1,ATG13,HDAC6,BCL2L11,TRIM13,RRAGB,ATG7,CDC37,WDFY3,CHMP2B,KLHL3,CHMP2A,RMC1,MTERF3,ATP6V1D,TPCN1,WIPI1,MAP1S,WDR41,UBQLN4,RRAGD,SNX6,RRAGC,ATG3,FUNDC2,PIP4K2C,MAP1LC3A,KLHL22,ATG4C,MTDH,TP53INP1,ATG4A,DYNLL2…
